## Effect of sacubitril/valsartan on cognitive function in patients with HFpEF: a prespecified analysis of PARAGON-HF

P. Dewan<sup>1</sup>, P.S. Jhund<sup>1</sup>, I.S. Anand<sup>2</sup>, A.S. Desai<sup>3</sup>, J. Gong<sup>4</sup>, M.P. Lefkowitz<sup>4</sup>, B. Pieske<sup>5</sup>, A.R. Rizkala<sup>4</sup>, S.J. Shah<sup>6</sup>, D.J. Van Veldhuisen<sup>7</sup>, F. Zannad<sup>8</sup>, M.R. Zile<sup>9</sup>, S.D. Solomon<sup>3</sup>, J.J.V. McMurray<sup>1</sup>

<sup>1</sup>University of Glasgow, Glasgow, United Kingdom; <sup>2</sup>University of Minnesota, Minneapolis, United States of America; <sup>3</sup>Brigham and Women's Hospital, Harvard Medical School, Boston, United States of America; <sup>4</sup>Novartis, East Hanover, United States of America; <sup>5</sup>German Center for Cardiovascular Research, Berlin, Germany; <sup>6</sup>Northwestern Medicine Central DuPage Hospital, Chicago, United States of America; <sup>7</sup>University Medical Center Groningen, Groningen, Netherlands (The); <sup>8</sup>University of Lorraine, Nancy, France; <sup>9</sup>Medical University of South Carolina, Charleston, United States of America

**Funding Acknowledgement:** Type of funding source: Private company. Main funding source(s): PARAGON-HF study was funded by Novartis Pharma.

**Background:** A theoretical concern has been raised about detrimental effects of sacubitril/valsartan (sac/val) on cognitive function as neprilysin is one of many pathways involved in clearance of amyloid beta peptides from brain tissue.

**Purpose:** To examine effect of sac/val, compared with valsartan, on cognitive function in patients with heart failure (HF) and preserved ejection fraction (HFpEF).

**Methods:** In the PARAGON-HF trial, cognitive function was tested in a subgroup of patients at baseline and follow-up, using Mini-Mental State Examination [MMSE] having a maximum score of 30 (higher scores reflect better cognitive function). Change in MMSE score from baseline to 96 wks was a prespecified exploratory endpoint. Other post hoc analyses included "cognitive decline" (fall in MMSE  $\geq 3$  pts) and assessment of cognition-related adverse events (AEs).

**Results:** Among 2895 patients (60% of total) in PARAGON-HF with baseline MMSE measurement, mean (SD) score was 27.4 (3.0) in patients receiving sac/val (1453) and 27.4 (2.9) in patients receiving valsartan (1442). There was no difference between sac/val and valsartan in MMSE score change from baseline to wk 96: sac/val  $-0.02$  (SE 0.07) and valsartan 0.00 (0.07); between-treatment difference  $-0.02$  (95% CI:  $-0.22$  to 0.18); p-value = 0.83. Cognitive decline at 96 weeks occurred in 115 of 1071 evaluable patients (10.7%) in sac/val group and 121 of 1053 patients (11.5%) in valsartan group; risk ratio 0.97 (0.75–1.26), p-value = 0.82. Cognition-related AEs were more frequent, than in PARADIGM-HF (likely as patients in PARAGON-HF were older) but, as in PARADIGM-HF, did not differ between sac/val and comparator treatment (Table).

**Conclusions:** Cognitive change, measured by MMSE, did not differ between treatment with sac/val & valsartan in patients with HFpEF.

| AE                                | PARAGON-HF       |                  | PARADIGM-HF      |                  |
|-----------------------------------|------------------|------------------|------------------|------------------|
|                                   | Sac/Val (2407)   | Valsartan (2389) | Sac/Val (4187)   | Enalapril (4212) |
| Cognitive impairment (Narrow SMQ) |                  |                  |                  |                  |
| No. (%)                           | 31 (1.29)        | 44 (1.84)        | 12 (0.29)        | 15 (0.36)        |
| Event rate/100 pt. yrs (95% CI)   | 0.45 (0.31–0.64) | 0.64 (0.48–0.87) | 0.12 (0.07–0.21) | 0.16 (0.10–0.27) |
| Cognitive impairment (Broad SMQ)  |                  |                  |                  |                  |
| No. (%)                           | 127 (5.28)       | 140 (5.86)       | 104 (2.48)       | 97 (2.30)        |
| Event rate/100 pt. yrs (95% CI)   | 1.88 (1.58–2.23) | 2.09 (1.77–2.47) | 0.92 (0.75–1.14) | 0.91 (0.73–1.12) |

AEs coded using 17.0 version of Medical Dictionary for Regulatory Activities (MedDRA) using Standardized MedDRA Queries (SMQs) with "broad" & "narrow" preferred terms related to cognition-related AEs.
